# Supplementary material
Source: PubMed Central journal article supplement (PMC1852365)
Supplement: biophysj_106.100404_1.pdf [file biophysj_106.100404_1.pdf]

# SUPPLEMENTAL MATERIAL

## Structure and dynamics of parallel $\beta$ -sheets, hydrophobic core, and loops in Alzheimer's $A\beta$ fibrils

Nicolae-Viorel Buchete and Gerhard Hummer

Laboratory of Chemical Physics, Building 5, National Institute of Diabetes and Digestive and Kidney Diseases, National Institutes of Health, Bethesda, Maryland 20892-0520

**Fig. S1.** The conformations of the infinite fibril segments for the S1, S2 and S3 systems after 10 ns of MD at 298 K. Top views of systems (A) S1- $C_{2z}$ , (B) S1- $C_{2x}$ , (C) S2- $C_{2z}$ , and (D) S3- $C_{2z}$ . Lateral view of systems (E) S1- $C_{2z}$ , (F) S1- $C_{2x}$ , (G) S2- $C_{2z}$ , and (H) S3- $C_{2z}$ .

**Fig. S2.** Secondary structure of the S2- $C_{2z}$  system along MD trajectories at (A) 298 K and (B) 398 K. Boxed regions indicate formation of helical structure (black).

**Fig. S3.** Secondary structure of the S3- $C_{2z}$  system along MD trajectories at (A) 298 K and (B) 398 K.

**Fig. S4.** Structures of  $A\beta_{1-40}$  dodecameric fibril segments during the NPT MD simulations at 298, 348 and 398 K. System S1- $C_{2z}$  with -0.5 initial staggering.

**Fig. S5.** Structures of  $A\beta_{1-40}$  dodecameric fibril segments during the NPT MD simulations at 298, 348 and 398 K. System S1- $C_{2x}$  with +0.5 initial staggering.

**Fig. S6.** Structures of  $A\beta_{1-40}$  dodecameric fibril segments during the NPT MD simulations at 298, 348 and 398 K. System S2- $C_{2z}$  with -1.5 initial staggering.

**Fig. S7.** Structures of  $A\beta_{1-40}$  dodecameric fibril segments during the NPT MD simulations at 298, 348 and 398 K. System S2- $C_{2z}$ -AGAA with -1.5 initial staggering and mutations V24A, S26A and N27A.

**Fig. S8.** Structures of  $A\beta_{1-40}$  dodecameric fibril segments during the NPT MD simulations at 298, 348 and 398 K. System S3- $C_{2z}$  with -1.5 initial staggering.

# Figures

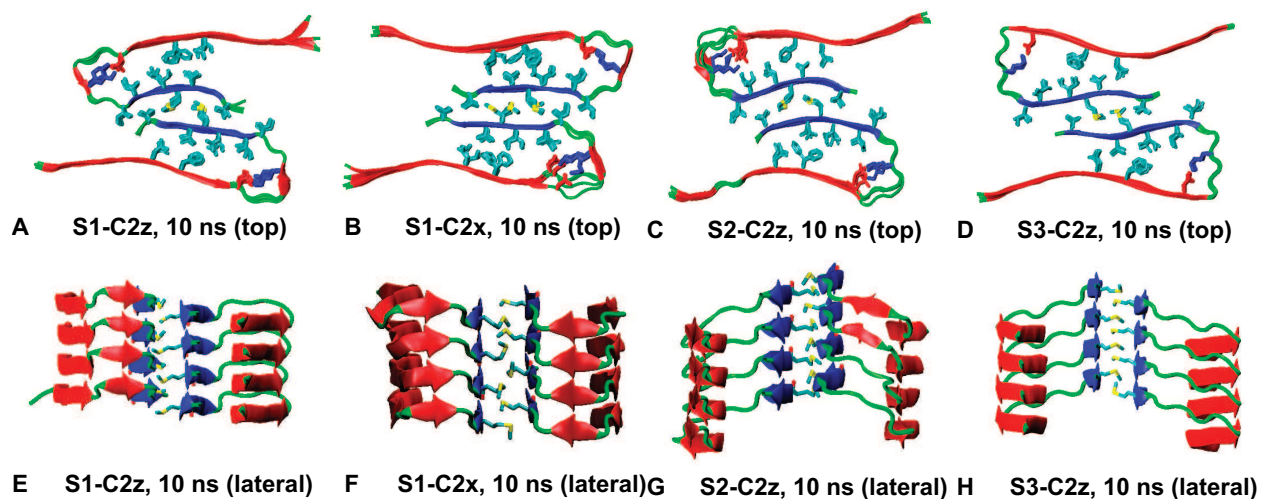

Fig. S 1:

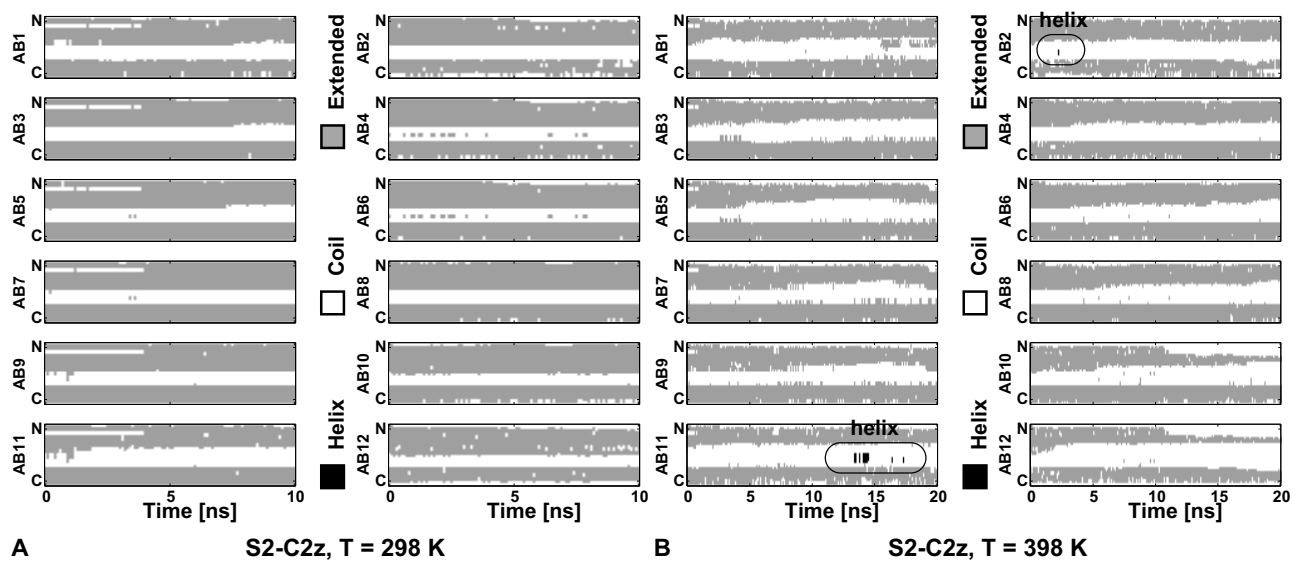

Fig. S 2:

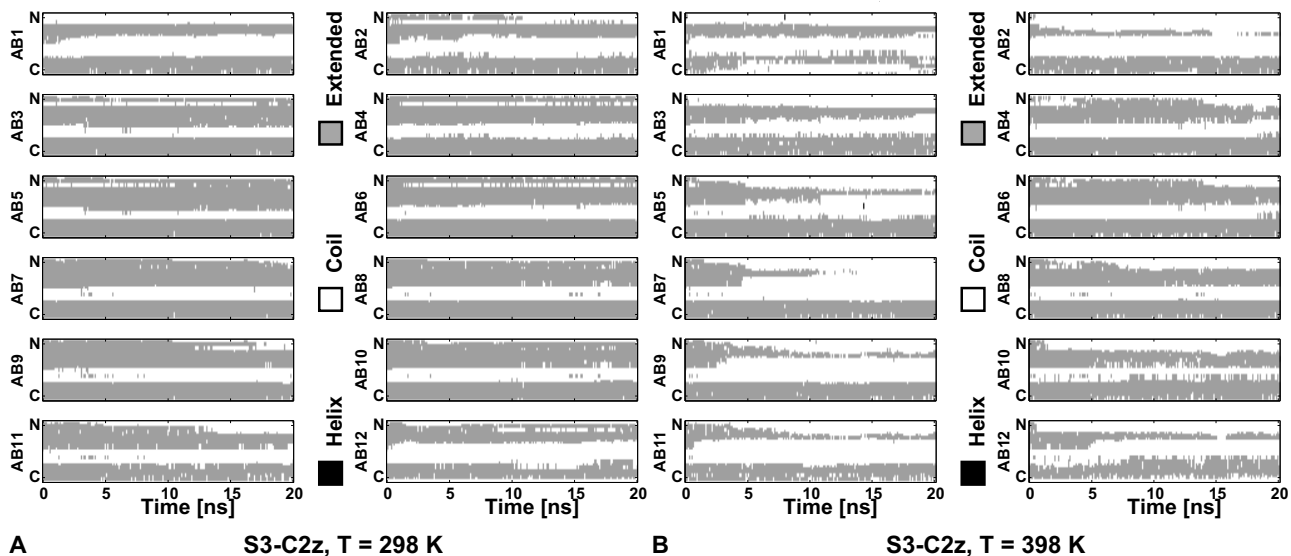

Fig. S 3:

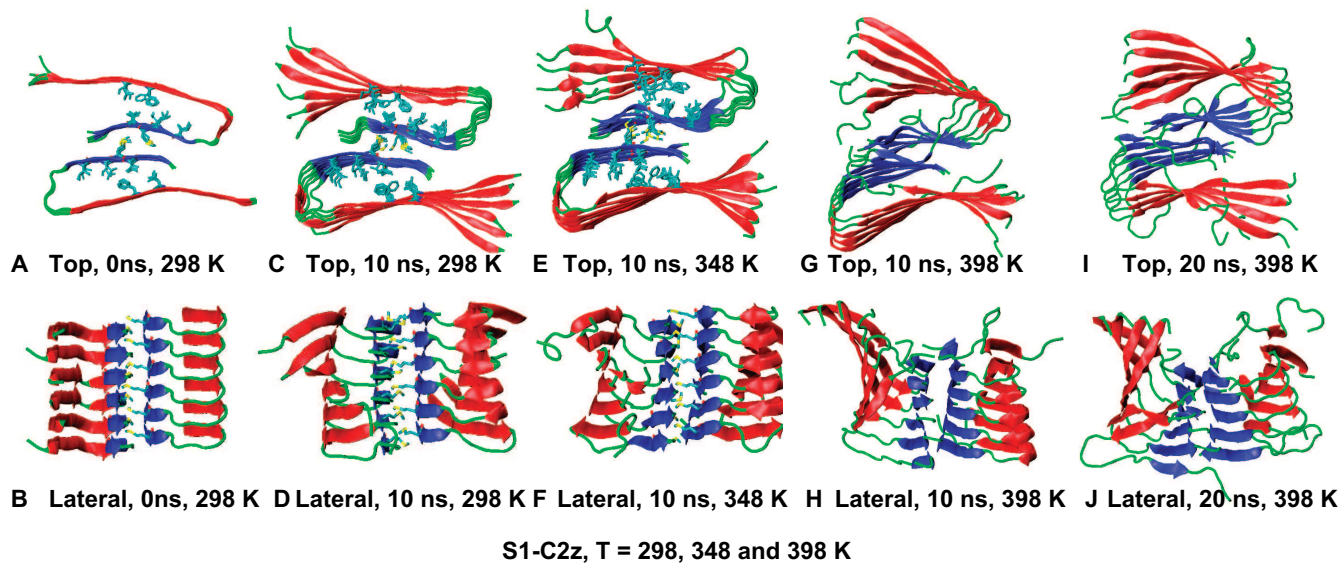

Fig. S 4:

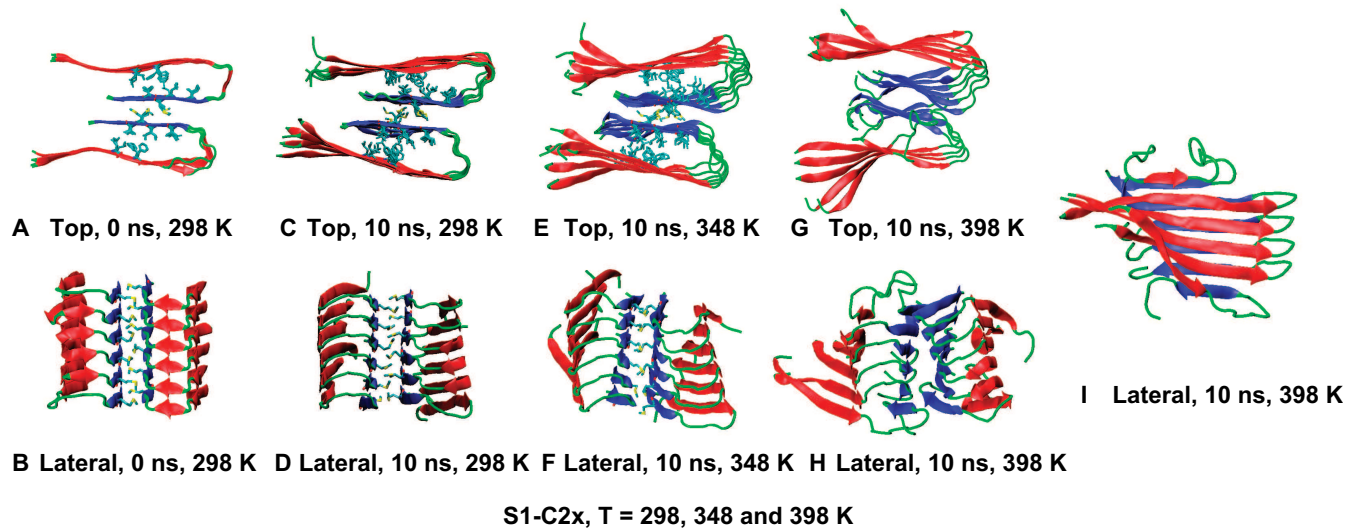

Fig. S 5:

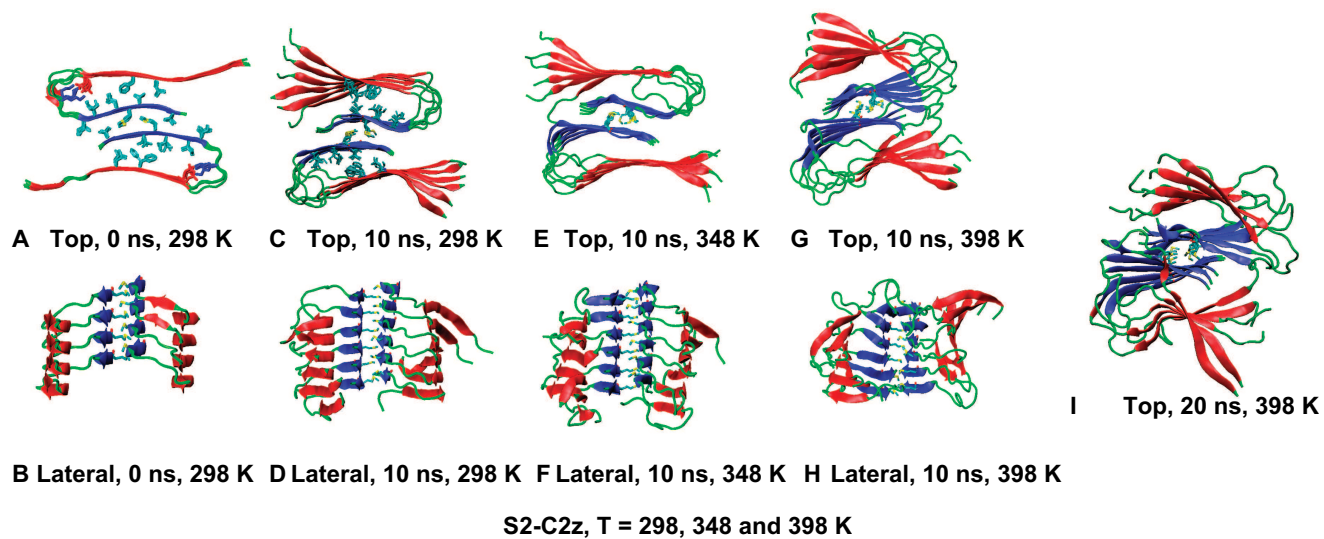

Fig. S 6:

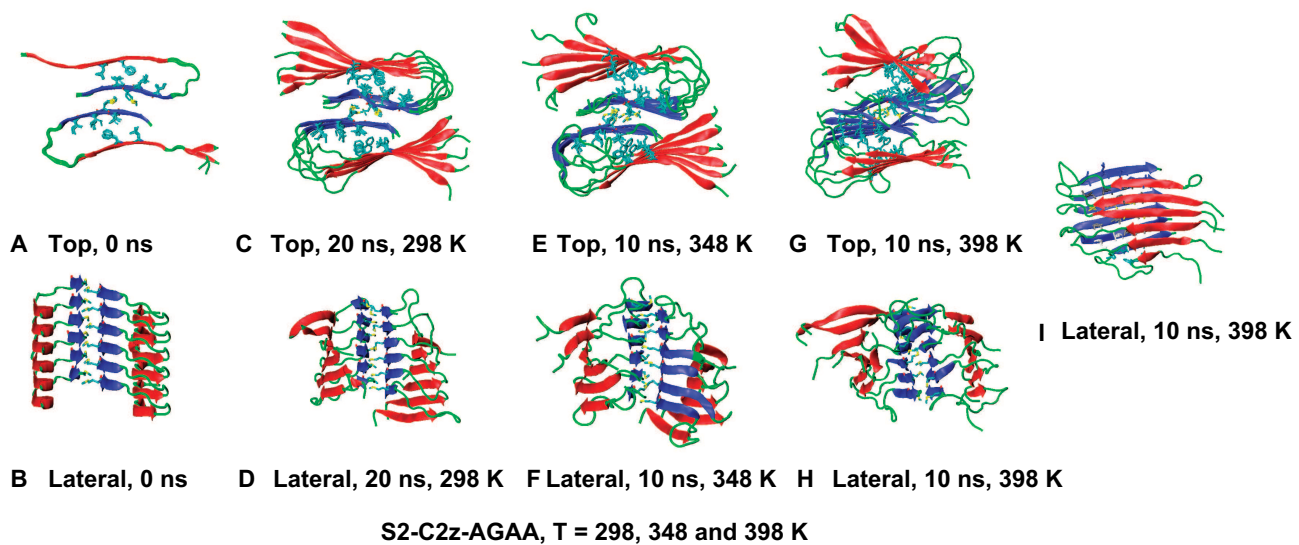

Fig. S 7:

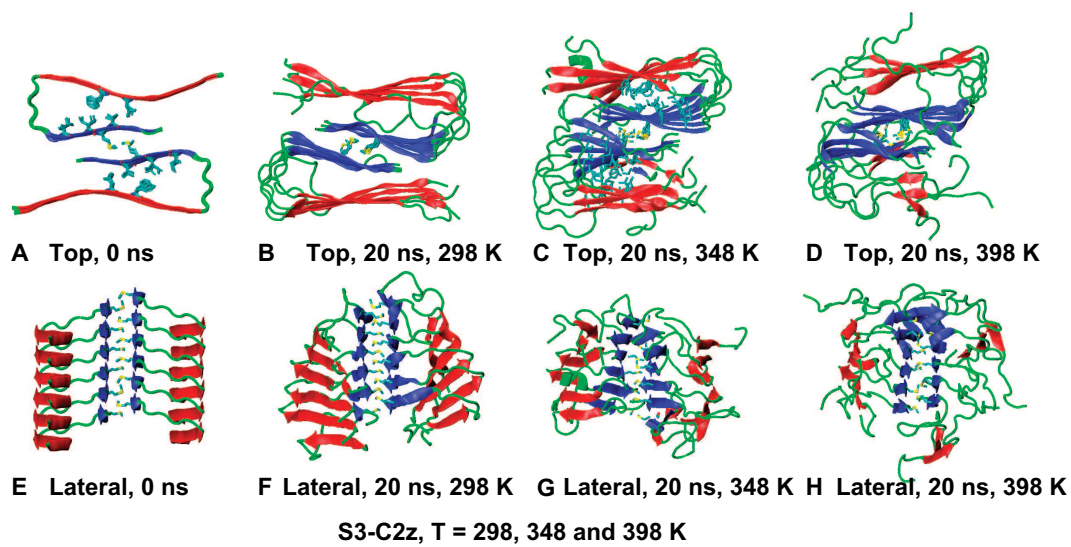

Fig. S 8:
